# Supplementary material for: Carbon nanotubes (CNT)-loaded ginsenosides Rb3 suppresses the PD-1/PD-L1 pathway in triple-negative breast cancer
Source: publisher site journal article supplement (doi:10.18632/aging.203131), 2021-06-10
Supplement: Supplementary file [file aging-v13i13-203131-supplementary-material-SD1.pdf]

**SUPPLEMENTARY FIGURES**

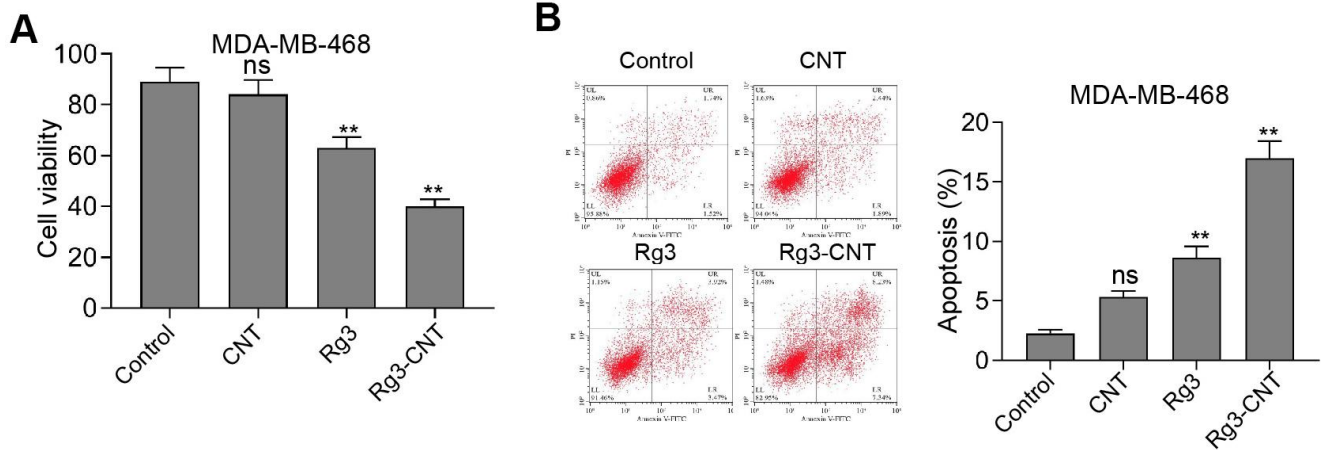

**Supplementary Figure 1. Rg3-CNT inhibits proliferation and induces apoptosis of TNBC cells.** (A, B) The MDA-MB-468 cells were treated with CNT, Rg3, or Rg3-CNT. (A) The cell viability was measured by the MTT assays in the cells. (B) The cell apoptosis was assessed by flow cytometry analysis in the cells. Data are presented as mean ± SD. Statistic significant differences were indicated: ns no significance, \*\*  $P < 0.01$ .

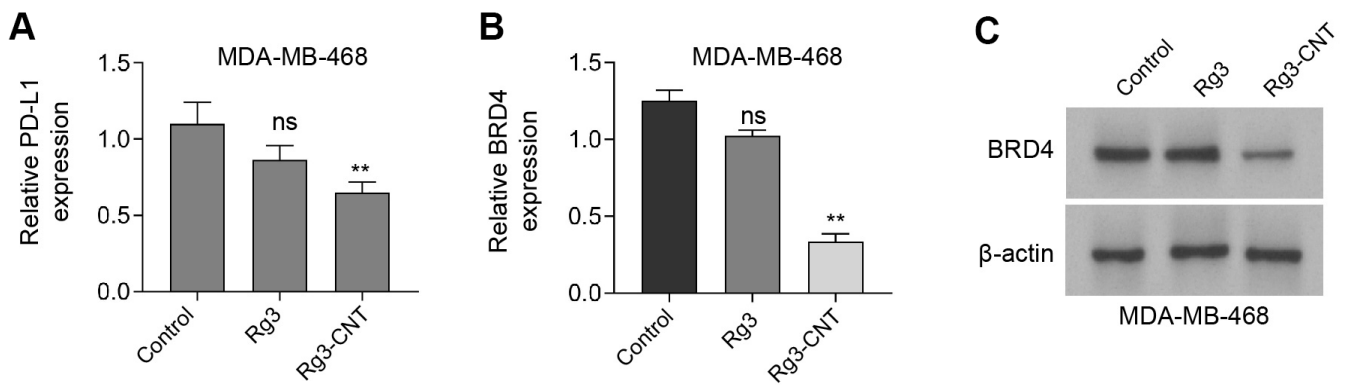

**Supplementary Figure 2. Rg3-CNT decreases PD-L1 expression in TNBC cells.** (A–C) The MDA-MB-468 cells were treated with Rg3 (60  $\mu$ g/ml) or Rg3-CNT (60  $\mu$ g/ml). (A) The expression of PD-L1 was analyzed by fluorescence-activated cell sorting (FACS) in the cells. (B) The mRNA expression of BRD4 was measured by qPCR in the cells. (C) The protein expression of BRD4 was tested by Western blot analysis in the cells. Data are presented as mean ± SD. Statistic significant differences were indicated: ns no significance, \*\*  $P < 0.01$ .
